# Supplementary material for: Factors associated with relapse in adult patients discharged from the emergency department following acute asthma: a systematic review
Source: PubMed Central journal article supplement — BMJ Open Respir Res. 2017 Jan 27;4(1):e000169. doi: 10.1136/bmjresp-2016-000169 (PMC5278313; doi:10.1136/bmjresp-2016-000169), 2017-01-27
Supplement: bmjresp-2016-000169supp_appendix.pdf [file bmjresp-2016-000169supp_appendix.pdf]

## Appendix 1: Search Strings

### Ovid MEDLINE(R) In-Process & Other Non-Indexed Citations, Ovid MEDLINE(R) Daily and Ovid MEDLINE(R) 1946 to Present

Date last searched: June 26, 2015

Number of results: 327

1. exp Asthma/
2. Bronchial Hyperreactivity/
3. Respiratory Hypersensitivity/
4. (reactive airway\* or asthma\* or bronchial hyperreactivity or bronchial hyper-reactivity or respiratory hypersensitivity).mp.
5. 1 or 2 or 3 or 4
6. Emergency Treatment/ or Emergency Medicine/ or emergency medical services/ or emergency service, hospital/ or trauma centers/ or triage/ or exp Evidence-Based Emergency Medicine/ or exp Emergency Nursing/ or Emergencies/
7. (emergent\* or ((emergenc\* or ED) adj (room\* or accident or ward or wards or unit or units or department\* or physician\* or doctor\* or nurs\* or treatment\* or visit\*))).mp.
8. (triage or critical care or acute care cent\* or (trauma adj (cent\* or care))).mp.
9. (accident adj2 emergency).mp.
10. "A/E".mp.
11. "A&E".mp.
12. or/6-11
13. limit 5 to "all child (0 to 18 years)"
14. limit 13 to "all adult (19 plus years)"
15. 5 not (13 not 14)
16. (relaps\* or recurr\* or recidivism or recrudesc\*).mp.
17. (readmission\* or reattendance or revisit or ((multiple or return or early or repeat) adj6 (visit\* or trip\*)) or ((unplanned or early) adj6 return\*)).mp.
18. 16 or 17
19. 15 and 18 and 12

### EBM Reviews - Cochrane Central Register of Controlled Trials May 2015

Date last searched: June 26, 2015

Number of results: 85

1. exp Asthma/
2. Bronchial Hyperreactivity/
3. Respiratory Hypersensitivity/
4. (reactive airway\* or asthma\* or bronchial hyperreactivity or bronchial hyper-reactivity or respiratory hypersensitivity).mp.
5. 1 or 2 or 3 or 4
6. Emergency Treatment/ or Emergency Medicine/ or emergency medical services/ or emergency service, hospital/ or trauma centers/ or triage/ or exp Evidence-Based Emergency Medicine/ or exp Emergency Nursing/ or Emergencies/

7. (emergicent\* or ((emergenc\* or ED) adj (room\* or accident or ward or wards or unit or units or department\* or physician\* or doctor\* or nurs\* or treatment\* or visit\*))).mp.
8. (triage or critical care or acute care cent\* or (trauma adj (cent\* or care))).mp.
9. (accident adj2 emergency).mp.
10. "A/E".mp.
11. "A&E".mp.
12. or/6-11
13. (relaps\* or recurr\* or recidivism or recrudesc\* or readmission\* or reattendance or revisit\*).mp.
14. (((multiple or return or early or repeat\*) adj6 (visit\* or trip\*)) or ((unplanned or early or unscheduled) adj6 (return\* or repeat\*)) or (repeat\* adj6 (use\* or utiliz\* or utilis\* or attend\* or presentation\* or patient\*))).mp.
15. 13 or 14
16. 5 and 12 and 15
17. ((pediatric\* or paediatric\* or child\* or newborn\* or congenital\* or infan\* or baby or babies or neonat\* or pre-term or preterm\* or premature birth\* or NICU or preschool\* or pre-school\* or toddler\* or boy or boys or girl\* or school\* or pubescen\* or juvenile\* or teen\* or youth\* or adolesc\* or pre-pubesc\* or prepubesc\*) not adult\*).ti.
18. 16 not 17

### **Embase 1974 to 2015 June 25**

Date last searched: June 26, 2015

Number of results: 540

1. exp asthma/
2. bronchus hyperreactivity/
3. respiratory tract allergy/
4. (reactive airway\* or asthma\* or bronchial hyperreactivity or bronchial hyper-reactivity or respiratory hypersensitivity).mp.
5. 1 or 2 or 3 or 4
6. emergency treatment/ or emergency medicine/ or exp emergency health service/ or evidence based emergency medicine/ or emergency nursing/ or exp emergency care/ or emergency ward/ or emergency/ or (emergicent\* or ((emergenc\* or ED) adj1 (room\* or accident or ward or wards or unit or units or department\* or physician\* or doctor\* or nurs\* or treatment\* or visit\*))).mp. or (triage or critical care or (trauma adj1 (cent\* or care))).mp.
7. (accident adj2 emergency).mp.
8. "A/E".mp.
9. "A&E".mp.
10. 6 or 7 or 8 or 9
11. (relaps\* or recurr\* or recidivism or recrudesc\* or readmission\* or reattendance or revisit\*).mp.
12. (((multiple or return or early or repeat\*) adj6 (visit\* or trip\*)) or ((unplanned or early or unscheduled) adj6 (return\* or repeat\*)) or (repeat\* adj6 (use\* or utiliz\* or utilis\* or attend\* or presentation\* or patient\*))).mp.
13. 11 or 12
14. 5 and 10 and 13

15. limit 14 to (infant or child or preschool child <1 to 6 years> or school child <7 to 12 years> or adolescent <13 to 17 years>)
16. limit 15 to (adult <18 to 64 years> or aged <65+ years>)
17. 14 not (15 not 16)
18. ((pediatric\* or paediatric\* or child\* or newborn\* or congenital\* or infan\* or baby or babies or neonat\* or pre-term or preterm\* or premature birth\* or NICU or preschool\* or pre-school\* or toddler\* or boy or boys or girl\* or school\* or pubescen\* or juvenile\* or teen\* or youth\* or adolesc\* or pre-pubesc\* or prepubesc\*) not adult\*.ti.
19. 17 not 18

### **CINAHL Plus with Full Text**

Date last searched: June 19, 2015

Number of results: 123

S1 ( (MH "Respiratory Hypersensitivity") OR (MH "Asthma+") ) OR ( "reactive airway\*" or asthma\* or "bronchial hyperreactivity" or "bronchial hyper-reactivity" or "respiratory hypersensitivity" )

S2 ( (MH "Triage") OR (MH "Triage (Iowa NIC)") OR (MH "Emergency Service+") OR (MH "Emergency Medicine") OR (MH "Emergency Nurse Practitioners") or (MH "Physicians, Emergency") OR (MH "Emergency Patients") OR (MH "Emergency Nursing+") OR (MH "Emergency Care (Saba CCC)") OR (MH "Emergencies+") OR (MH "Emergency Treatment+") OR (MH "Emergency Care") OR (MH "Emergency Care (Iowa NIC)") ) OR emergent\* OR (

((emergenc\* or ED) n2 (room\* or accident or ward or wards or unit or units or department\* or physician\* or doctor\* or nurs\* or treatment\* or visit\*)) ) OR accident w2 emergency

S3 ( relaps\* or recurr\* or recidivism or recrudesc\* or readmission\* or reattendance or revisit\* ) OR ( ((multiple or return or early or repeat\*) n6 (visit\* or trip\*)) or ((unplanned or early or unscheduled) n6 (return\* or repeat\*)) or (repeat\* n6 (use\* or utiliz\* or utilis\* or attend\* or presentation\* or patient\*))) )

S4 S1 AND S2 AND S3

S5 TI (pediatric\* or paediatric\* or child\* or newborn\* or congenital\* or infan\* or baby or babies or neonat\* or pre-term or preterm\* or premature birth\* or NICU or preschool\* or pre-school\* or toddler\* or boy or boys or girl\* or school\* or pubescen\* or juvenile\* or teen\* or youth\* or adolesc\* or pre-pubesc\* or prepubesc\*) not adult\*

S6 S4 NOT S5

### **SCOPUS**

Date last searched: June 26, 2015

Number of results: 359

( TITLE-ABS-KEY ( "reactive airway\*" OR asthma\* OR "bronchial hyperreactivity" OR "bronchial hyper-reactivity" OR "respiratory hypersensitivity" )

AND

TITLE-ABS-KEY ( relaps\* OR recurr\* OR recidivism OR recrudesc\* OR readmission\* OR reattendance OR revisit OR "return visit\*" OR "repeat\* visit\*" OR "unscheduled return" OR "early return" OR "return trip" OR "repeat\* trip\*" OR "unplanned return" )

AND

TITLE-ABS-KEY ( "emergency treatment" OR "emergency medicine" OR "emergency service\*" OR triage OR "trauma cent\*" OR "critical care cent\*" OR "trauma care" OR "acute care cent\*" OR (accident W/2 emergency) OR emergicent\* OR "emergency room\*" OR "emergency department\*" )

AND NOT

TITLE ( (pediatric\* OR paediatric\* OR child\* OR preschool\* OR pre-school\* OR toddler\* OR boy OR girl\* OR school\* OR juvenile\* ) AND NOT adult\* )

### **Proquest Dissertations and Full Text Global**

Date last searched: June 19, 2015

Number of results: 8

all("reactive airway\*" OR asthma\* OR "bronchial hyperreactivity" OR "bronchial hyper-reactivity" OR "respiratory hypersensitivity")

AND

all(relaps\* OR recurr\* OR recidivism OR recrudesc\* OR readmission\* OR reattendance OR revisit OR "return visit\*" OR "repeat\* visit\*" OR "unscheduled return" OR "early return" OR "return trip" OR "repeat\* trip\*" OR "unplanned return")

AND

all("emergency treatment" OR "emergency medicine" OR "emergency service\*" OR triage OR "trauma cent\*" OR "critical care cent\*" OR "trauma care" OR "acute care cent\*" OR "accident and emergency" OR "accident emergency" OR emergicent\* OR "emergency room" OR "emergency department" OR "emergency ward\*" OR "emergency unit\*")

NOT

ti((pediatric\* OR paediatric\* OR child\* OR newborn\* OR congenital\* OR infan\* OR baby OR babies OR neonat\* OR pre-term OR preterm\* OR premature birth\* OR NICU OR preschool\* OR pre-school\* OR toddler\* OR boy OR boys OR girl\* OR school\* OR pubescen\* OR juvenile\* OR teen\* OR youth\* OR adolesc\* OR pre-pubesc\* OR prepubesc\*) NOT adult\*)

### **LILACS**

Date last searched: June 26, 2015

Number of results: 11 (But only 3 once child and COPD articles removed)

asthma or asthmatic or asthmatics or asma [Words] and relapse or relapses or recurrent or recurrence or readmission or reattendance or revisit or "return visit" or "repeat visit" or "unscheduled return" or "early return" or "return trip" or "repeat trip" or "unplanned return" or recurrente or recaida or re-asistencia or regreso or repetido [Words] and "emergency treatment" or "emergency medicine" or "emergency services" or triage or "trauma center" or "critical care center" or "trauma care" or "acute care center" or "accident and emergency" or "accident & emergency" or emergicenter or "emergency room" or "emergency department" or "emergency ward" or emergencia [Words]
